# Supplementary material for: New Derivatives of 5-((1-Methyl-Pyrrol-2-yl) Methyl)-4-(Naphthalen-1-yl)-1,2,4-Triazoline-3-Thione and Its Coordination Compounds with Anticancer Activity
Source: MDPI journal article supplement (doi:10.3390/ijms23169162), 2022-08-15
Supplement: s1 [file s1]

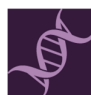

# New Derivatives of 5-((1-methyl-pyrrol-2-yl) methyl)-4-(naphthalen-1-yl)-1,2,4-triazoline-3-thione and its Coordination Compounds with Anticancer Activity

Agnieszka Czyłkowska <sup>1,\*</sup>, Suneel Lanka <sup>1</sup>, Małgorzata Szczesio <sup>1</sup>, Kamila Czarnecka <sup>2</sup>, Paweł Szymański <sup>2,3</sup>, Monika Pitucha <sup>4</sup>, Aneta Drabińska <sup>5</sup>, Bruno Cury Camargo <sup>6</sup> and Jacek Szczytko <sup>6</sup>

<sup>1</sup> Institute of General and Ecological Chemistry, Faculty of Chemistry, Lodz University of Technology, Zeromskiego 116, 90-924 Lodz, Poland; <sup>2</sup> Department of Pharmaceutical Chemistry, Drug Analyses and Radiopharmacy, Faculty of Pharmacy, Medical University of Lodz, Muszynskiego 1, 90-151 Lodz, Poland

<sup>3</sup> Department of Radiobiology and Radiation Protection, Military Institute of Hygiene and Epidemiology, 4 Kozielska St., 01-163 Warsaw, Poland

<sup>4</sup> Independent Radiopharmacy Unit, Faculty of Pharmacy, Medical University of Lublin, Chodzki 4A, 20-093 Lublin, Poland

<sup>5</sup> Faculty of Physics, University of Warsaw, Pasteura 5, 02-093 Warszawa, Poland

<sup>6</sup> Institute of Experimental Physics, Faculty of Physics, University of Warsaw, Pasteura 5, 02-093 Warszawa, Poland

\* Correspondence: agnieszka.czyłkowska@p.lodz.pl

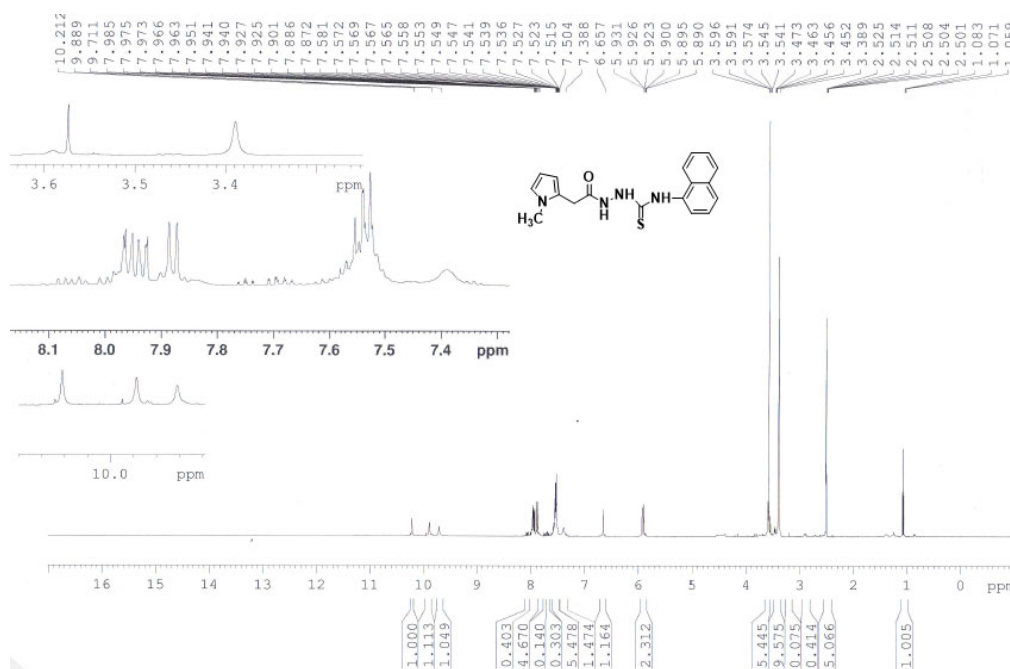

<sup>1</sup>H-NMR Spectra of Compound B

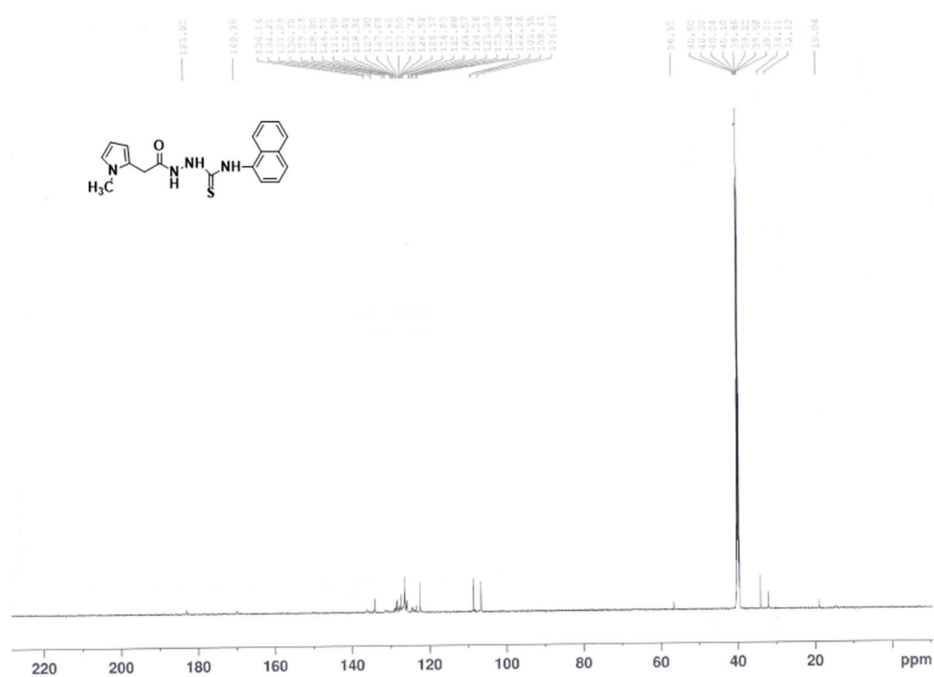

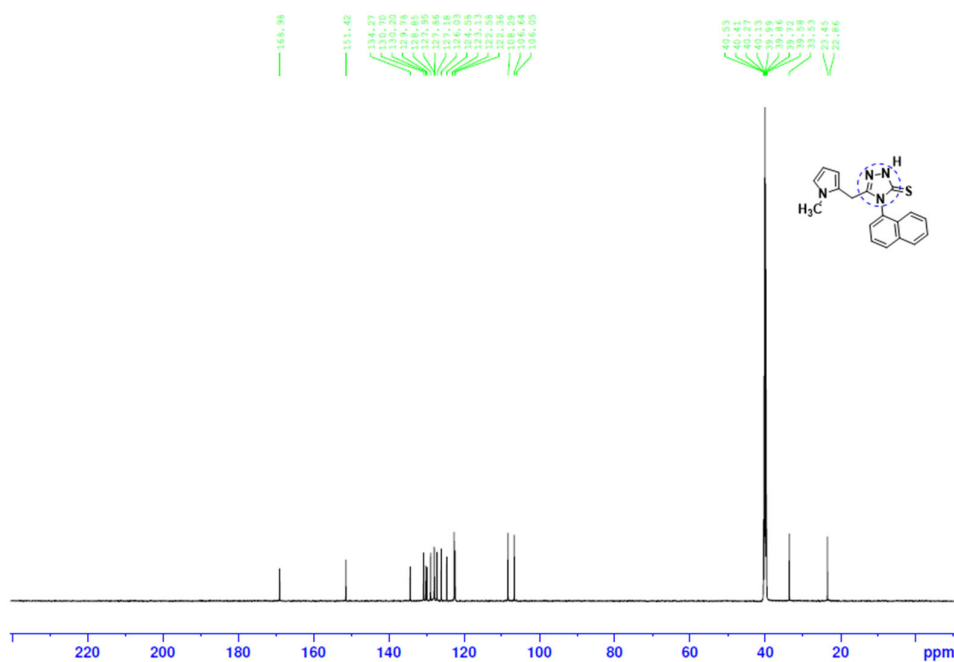<sup>13</sup>C-NMR Spectra of Compound C15Figure S2. <sup>1</sup>H-NMR and <sup>13</sup>C-NMR Spectra of Compound C15.

Table S1. ICP and CHN analysis of five (1-5) new coordination compounds.

| No  | Complex                                                                              | M.W<br>(g/mol) | Col-<br>our | Metal% |           | Sulphur%  |           | Carbon%   |           | Hydrogen% |           | Nitrogen% |           |
|-----|--------------------------------------------------------------------------------------|----------------|-------------|--------|-----------|-----------|-----------|-----------|-----------|-----------|-----------|-----------|-----------|
|     |                                                                                      |                |             | Calc.  | Foun<br>d | Cal<br>c. | Foun<br>d | Calc.     | Foun<br>d | Calc.     | Foun<br>d | Calc.     | Foun<br>d |
| (1) | C <sub>19</sub> H <sub>20</sub> OCl <sub>2</sub> M<br>nN <sub>4</sub> S              | 478.281        | Yel-<br>low | 11.49  | 11.8<br>1 | 6.7<br>0  | 7.37      | 47.7<br>1 | 48.19     | 4.22      | 3.98      | 11.7<br>1 | 12.14     |
| (2) | C <sub>19</sub> H <sub>20</sub> OCl <sub>2</sub> Fe<br>N <sub>4</sub> S              | 479.188        | Red         | 11.65  | 12.5<br>6 | 6.6<br>9  | 6.61      | 47.6<br>2 | 47.87     | 4.21      | 4.00      | 11.6<br>9 | 12.11     |
| (3) | C <sub>19</sub> H <sub>20</sub> OCl <sub>2</sub> Ni<br>N <sub>4</sub> S              | 482.036        | Yel-<br>low | 12.19  | 13.0<br>8 | 6.6<br>5  | 7.35      | 47.3<br>4 | 47.98     | 4.18      | 3.96      | 11.6<br>2 | 12.06     |
| (4) | C <sub>36</sub> H <sub>32</sub> Cl <sub>2</sub> Cu<br>N <sub>8</sub> S <sub>2</sub>  | 775.354        | Black       | 8.19   | 8.52      | 8.2<br>7  | 8.34      | 55.7<br>7 | 55.89     | 3.64      | 3.66      | 14.4<br>5 | 14.61     |
| (5) | C <sub>72</sub> H <sub>64</sub> Cl <sub>2</sub> Zn<br>N <sub>16</sub> S <sub>4</sub> | 1418.064       | Pink        | 4.61   | 4.85      | 9.0<br>5  | 8.48      | 60.9<br>9 | 60.51     | 3.98      | 3.96      | 15.8<br>0 | 15.49     |
